# Supplementary material for: Photochemical studies as a function of solvent viscosity. A new photochemical pathway in the reaction of (η5-C5H4Me)2Mo2(CO)6 with CCl4
Source: Royal Society of Chemistry journal article supplement (doi:10.1039/b202112a), 2002-06-01
Supplement: b202112a.pdf [file b202112a.pdf]

**Electronic Supplementary Information for**

**Photochemical studies as a function of solvent viscosity. A new photochemical pathway in the reaction of  $(\eta^5\text{-C}_5\text{H}_4\text{Me})_2\text{Mo}_2(\text{CO})_6$  with  $\text{CCl}_4$**

Dale A. Braden, Eileen E. Parrack, and David R. Tyler\*

*Department of Chemistry, University of Oregon, Eugene, OR 97403-1253 USA*

**Name and address of corresponding author:**

Professor David Tyler, Department of Chemistry, University of Oregon,

Eugene, Oregon 97403-1253 USA

e-mail: [dtyler@oregon.uoregon.edu](mailto:dtyler@oregon.uoregon.edu)

Plots of quantum yields for photolysis of  $\text{Cp}'_2\text{Mo}_2(\text{CO})_6$  in various solvents including 20%  $\text{CCl}_4$  by volume. In each plot the dashed line is the fit using eq 2 and the solid line is the fit using eq 3.

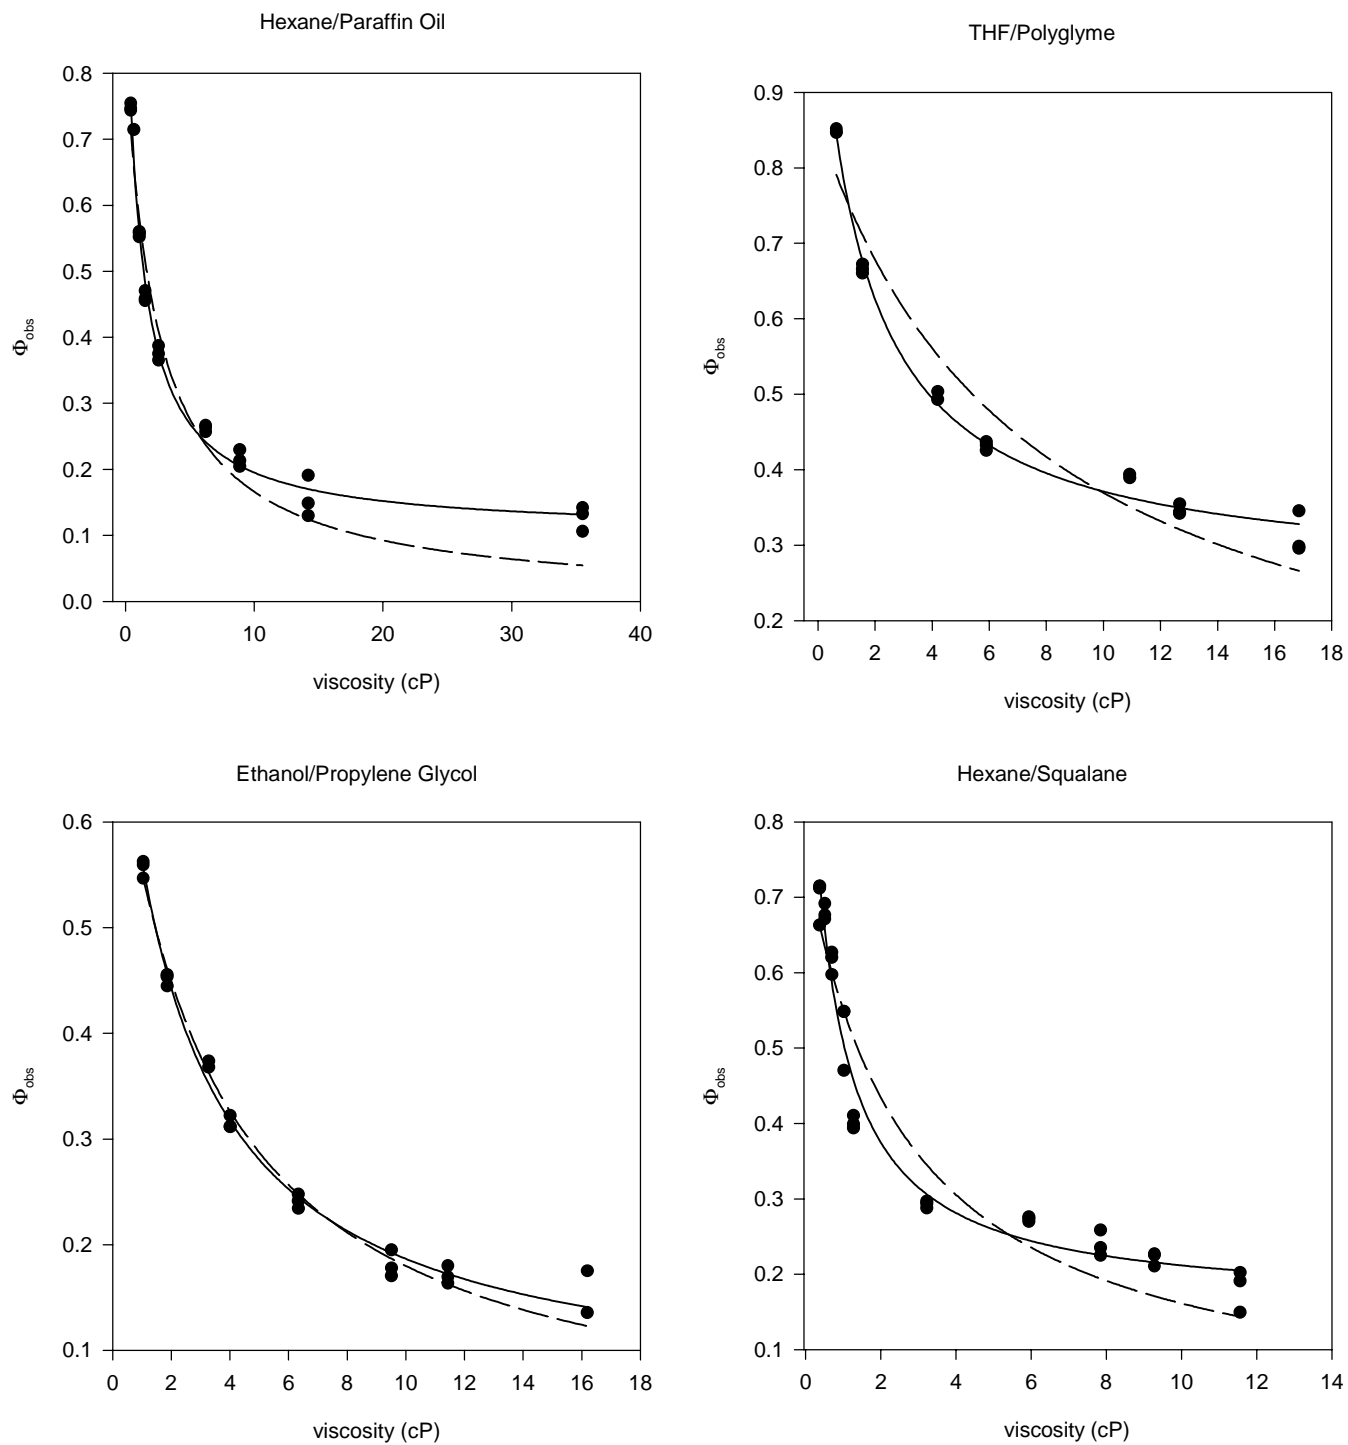

**Table 1.** Observed quantum yields for photolysis of  $\text{Cp}'_2\text{Mo}_2(\text{CO})_6$  at 546 nm in PDMS-50/ $\text{CCl}_4$  mixtures (first 9 entries) and in PDMS-200/ $\text{CCl}_4$  (last 14 entries).

| % $\text{CCl}_4$ (v/v) | viscosity/cP | $\phi_{\text{obs}}$ |
|------------------------|--------------|---------------------|
| 20                     | 18.82        | 0.25                |
| 20                     | 18.82        | 0.23                |
| 20                     | 18.82        | 0.29                |
| 10                     | 31.95        | 0.17                |
| 10                     | 31.95        | 0.19                |
| 10                     | 31.95        | 0.17                |
| 0                      | 48.00        | 0.01                |
| 0                      | 48.00        | 0.01                |
| 0                      | 48.00        | 0.003               |
| 30                     | 62.13        | 0.24                |
| 30                     | 62.13        | 0.24                |
| 30                     | 62.13        | 0.25                |
| 20                     | 79.64        | 0.23                |
| 20                     | 79.64        | 0.24                |
| 20                     | 79.64        | 0.22                |
| 10                     | 133.3        | 0.19                |
| 10                     | 133.3        | 0.18                |
| 7                      | 138.5        | 0.17                |
| 7                      | 138.5        | 0.16                |
| 7                      | 138.5        | 0.17                |
| 0                      | 193.6        | 0.0004              |
| 0                      | 193.6        | 0.002               |
| 0                      | 193.6        | 0.0005              |

**Table 2.** Values of fitting parameters in eq 3 for photolysis of  $\text{Cp}'_2\text{Mo}_2(\text{CO})_6$ .

| Solvent/ $\text{CCl}_4$  | $\phi_{\text{pair}}$ | $c/cP$          | $\phi_x$         |
|--------------------------|----------------------|-----------------|------------------|
| PDMS                     | $0.84 \pm 0.12$      | $0.35 \pm 0.08$ | $0.24 \pm 0.004$ |
| paraffin oil             | $0.88 \pm 0.03$      | $1.16 \pm 0.13$ | $0.10 \pm 0.01$  |
| squalane                 | $0.90 \pm 0.08$      | $0.64 \pm 0.15$ | $0.16 \pm 0.02$  |
| THF/polyglyme            | $0.84 \pm 0.05$      | $1.78 \pm 0.44$ | $0.23 \pm 0.02$  |
| ethanol/propylene glycol | $0.74 \pm 0.02$      | $2.25 \pm 0.29$ | $0.05 \pm 0.01$  |

**Saturation in CCl<sub>4</sub>.** The method described in this paper for obtaining  $F_{cP}$  requires that all free radicals be trapped (i.e., that no radical cage pairs form by diffusion together of free radicals, the reverse of the  $k_{dP}$  step in Scheme I). This condition was confirmed by studying the quantum yields for the reaction of  $Cp_2Mo_2(CO)_6$  with  $CCl_4$  in both THF and hexane as a function of  $[CCl_4]$ . Saturation occurred at about 0.1 M  $CCl_4$ , indicative of complete free radical trapping. Experiments in this study used  $[CCl_4] = 2$  M. A decrease in the quantum yield was observed at  $\approx 10$  M (neat  $CCl_4$ ); this downturn is attributed to the increase in viscosity of neat  $CCl_4$  (0.908 cP at 25 °C) compared to the THF solutions (0.456 cP at 25 °C).
